# Supplementary material for: Fitness Analysis and Transcriptome Profiling Following Repeated Mild Heat Stress of Varying Frequency in Drosophila melanogaster Females
Source: MDPI journal article supplement (doi:10.3390/biology10121323), 2021-12-14
Supplement: s1 [file s1]

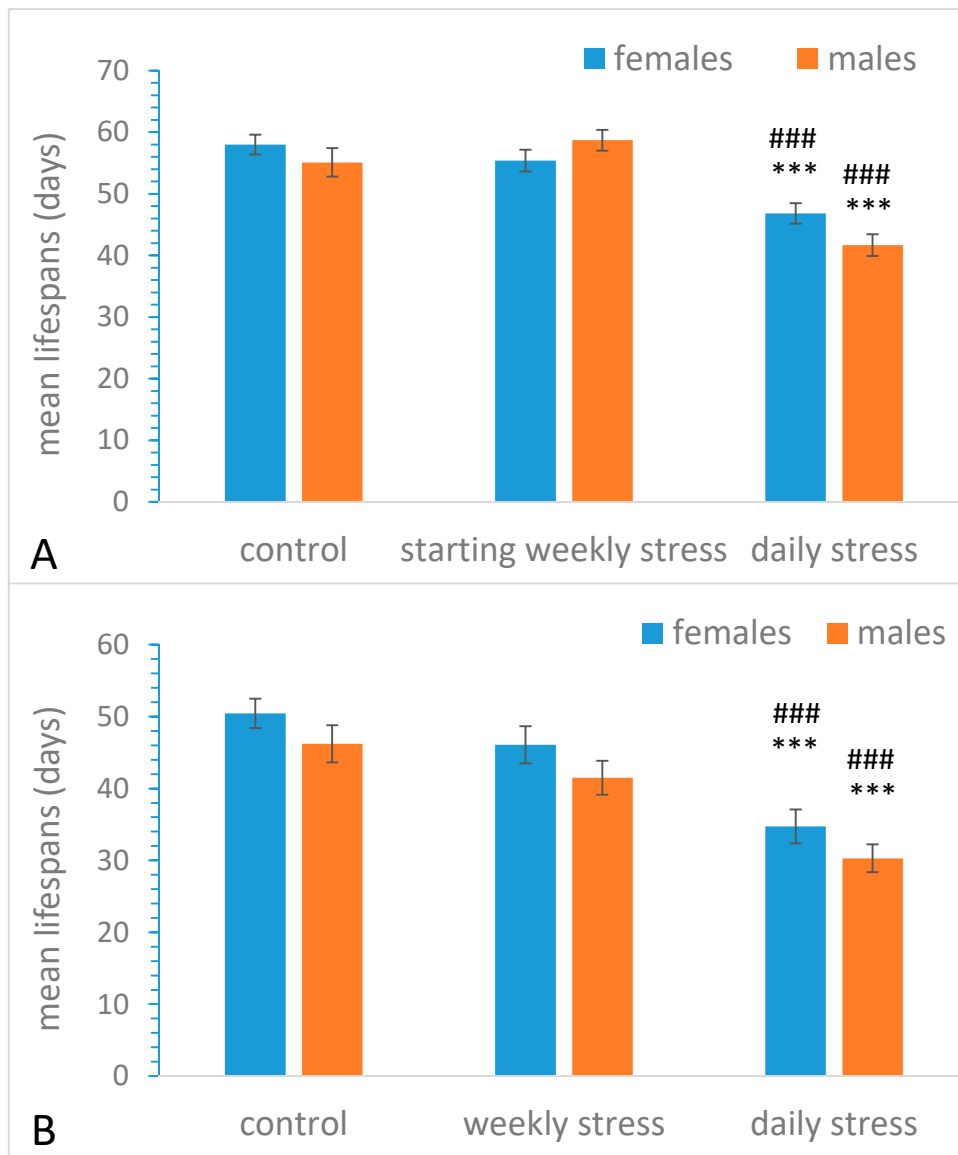

**Figure S1.** Mean lifespans of *D. melanogaster* Canton S females and males affected by the mild heat stress (38°C, 1 h) repeated (A) once a day during the overall lifetime (daily stress) or once a week within the first 2 weeks (starting weekly stress); (B) once a day or once a week during the overall lifetime (daily stress and weekly stress, respectively). Each group under study includes 50 flies.
