# Supplementary material for: Fitness Analysis and Transcriptome Profiling Following Repeated Mild Heat Stress of Varying Frequency in Drosophila melanogaster Females
Source: MDPI journal article supplement (doi:10.3390/biology10121323), 2021-12-14
Supplement: s1 [file s1]

**Table S5.** Pearson correlation values between 4 *Stat92E* isoforms and *Turandot* family.

| Variables      | Stat_92E_3   | Stat_92E_major | Stat_92E_1   | Stat_92E_2   | TotA         | TotC         | TotM         |
|----------------|--------------|----------------|--------------|--------------|--------------|--------------|--------------|
| Stat_92E_3     | <b>1</b>     | 0.251          | <b>0.782</b> | <b>0.743</b> | <b>0.860</b> | 0.527        | <b>0.672</b> |
| Stat_92E_major | 0.251        | <b>1</b>       | 0.395        | <b>0.615</b> | 0.021        | -0.329       | -0.212       |
| Stat_92E_1     | <b>0.782</b> | 0.395          | <b>1</b>     | <b>0.942</b> | <b>0.620</b> | 0.282        | 0.453        |
| Stat_92E_2     | <b>0.743</b> | <b>0.615</b>   | <b>0.942</b> | <b>1</b>     | 0.566        | 0.250        | 0.334        |
| TotA           | <b>0.860</b> | 0.021          | <b>0.620</b> | 0.566        | <b>1</b>     | <b>0.746</b> | <b>0.836</b> |
| TotC           | 0.527        | -0.329         | 0.282        | 0.250        | <b>0.746</b> | <b>1</b>     | <b>0.639</b> |
| TotM           | <b>0.672</b> | -0.212         | 0.453        | 0.334        | <b>0.836</b> | <b>0.639</b> | <b>1</b>     |

*Values in bold are different from 0 with a significance level  $\alpha=0.05$*
