# Supplementary material for: Fitness Analysis and Transcriptome Profiling Following Repeated Mild Heat Stress of Varying Frequency in Drosophila melanogaster Females
Source: MDPI journal article supplement (doi:10.3390/biology10121323), 2021-12-14
Supplement: s1 [file s1]

**Table S4.** STAR (Dobin, Gingeras, 2015) summary gene mapping statistics employed on 11 samples.

| <b>samples:</b>                              | <b>c1</b> | <b>c2</b> | <b>c3</b> | <b>day1</b> | <b>day2</b> | <b>day3</b> | <b>day4</b> | <b>week1</b> | <b>week2</b> | <b>week3</b> | <b>week4</b> |
|----------------------------------------------|-----------|-----------|-----------|-------------|-------------|-------------|-------------|--------------|--------------|--------------|--------------|
| Number of input reads, mln                   | 38.2      | 36.2      | 40.6      | 34.7        | 41.5        | 37.5        | 40.8        | 37.5         | 37.8         | 32.6         | 37.5         |
| Average input read length, bp                | 74        | 74        | 73        | 75          | 74          | 75          | 75          | 75           | 74           | 75           | 75           |
| <b>UNIQUE READS:</b>                         |           |           |           |             |             |             |             |              |              |              |              |
| Uniquely mapped reads number, mln            | 34.9      | 32.7      | 36.9      | 33.0        | 39.4        | 35.2        | 38.7        | 34.7         | 35.5         | 30.7         | 36.0         |
| Uniquely mapped reads %                      | 91,2      | 90,2      | 90,9      | 95,1        | 95,0        | 93,8        | 94,8        | 92,5         | 93,8         | 94,3         | 96,1         |
| Average mapped read length, bp               | 75.3      | 75.3      | 75.3      | 75.3        | 75.3        | 75.3        | 75.3        | 75.3         | 75.3         | 75.3         | 75.3         |
| Number of splices: Total (thos*)             | 3894.3    | 2787.5    | 3353.0    | 3774.2      | 4039.8      | 3673.1      | 4799.7      | 3309.4       | 3955.4       | 3182.4       | 4374.2       |
| Number of splices: Annotated (sjdb**), thos* | 3872.4    | 2766.1    | 3331.8    | 3754.0      | 4018.7      | 3651.8      | 4772.9      | 3289.4       | 3936.6       | 3161.9       | 4352.3       |
| Number of splices: GT/AG , thos*             | 3862.4    | 2763.9    | 3324.4    | 3747.1      | 4004.4      | 3640.7      | 4764.2      | 3275.0       | 3921.7       | 3155.0       | 4343.2       |
| Number of splices: GC/AG thos*               | 31063     | 22903     | 27696     | 26182       | 34146       | 31411       | 34250       | 33586        | 32386        | 26717        | 30105        |
| Number of splices: AT/AC                     | 839       | 760       | 876       | 944         | 1211        | 968         | 1330        | 877          | 1257         | 675          | 917          |

\* thos - thousands

\*\* sjdb - splice junctions database is generated from GTF (Dobin A, Gingeras TR. Mapping RNA-seq Reads with STAR. Curr Protoc Bioinformatics. 2015 Sep 3;51:11.14.1-11.14.19. doi: 10.1002/0471250953.bi1114s51. PMID: 26334920; PMCID: PMC4631051.
