# Supplementary material for: Fitness Analysis and Transcriptome Profiling Following Repeated Mild Heat Stress of Varying Frequency in Drosophila melanogaster Females
Source: MDPI journal article supplement (doi:10.3390/biology10121323), 2021-12-14
Supplement: s1 [file s1]

**Table S2.** Agglomerative hierarchical clustering with consequent merging of sub-clusters to three basic groups depicted in Figure 5. Distinct clusters within one class separated by line.

| <b>Control (1)</b> | <b>Day (2)</b> | <b>Week (3)</b> |
|--------------------|----------------|-----------------|
| CG12374            | TotM           | CG10472         |
| betaTry            | Sodh-1         | CG12057         |
| Jon25Bi            | CG42704        | Jon99Fi         |
| CG18180            | CG34227        | CG18404         |
| Jon25Bii           | TotA           | Jon99Fii        |
| epsilonTry         | CG43090        | Peritrophin-15a |
| Amy-d              | AttA           | CG8560          |
| Jon99Ci            | CG3699         | CG17633         |
| Pebp1              | CG14245        | CG17571         |
| Amy-p              | CG42705        | Npc2d           |
| MtnB               | CG18003        | Jon66Ci         |
| CG15406            | CG43085        | CG43774         |
| Jon74E             | Sodh-2         | CG5399          |
| CG5107             | CG32284        | thetaTry        |
| CG34026            | CG42807        | lambdaTry       |
| Diedel3            | CG17239        | CG8562          |
| CG15043            | CG32023        | CG13454         |
| Mal-A6             | CG13324        | CG5399          |
| CG17234            | CG17475        | amd             |
| CG8834             | CG10361        | Obp19c          |
| Irk2               | CG43175        | CG14187         |
| CG5246             | Ser12          | Fcp3C           |
| Cyp6a8             | CG3513         | CG10407         |
| Cyp4e3             | CG13905        | Nep2            |
| phu                | CG6495         | Osi2            |
|                    | Lsp2           |                 |
|                    | CG31266        |                 |
|                    | CG13311        |                 |
|                    | CG7720         |                 |
|                    | Send1          |                 |
|                    | CG11878        |                 |
|                    | Send2          |                 |
|                    | CG31267        |                 |
|                    | NKCC           |                 |
|                    | Hsp23          |                 |
|                    | Fst            |                 |
|                    | CG33258        |                 |
|                    | TotC           |                 |
|                    | CG10407        |                 |
|                    | ImpL2          |                 |
